# Supplementary material for: Use of record-linkage to handle non-response and improve alcohol consumption estimates in health survey data: a study protocol
Source: PubMed Central journal article supplement — BMJ Open. 2013 Mar 1;3(3):e002647. doi: 10.1136/bmjopen-2013-002647 (PMC3612815; doi:10.1136/bmjopen-2013-002647), 2013-03-01
Supplement: bmjopen-2013-002647.draft_revisions.pdf [file bmjopen-2013-002647.draft_revisions.pdf]

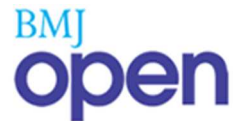

**Use of record-linkage to handle non-response and improve alcohol consumption estimates in health survey data: A study protocol**

|                                 |                                                                                                                                                                                                                                                                                                                                                                                                                                                                                                                                                                                                               |
|---------------------------------|---------------------------------------------------------------------------------------------------------------------------------------------------------------------------------------------------------------------------------------------------------------------------------------------------------------------------------------------------------------------------------------------------------------------------------------------------------------------------------------------------------------------------------------------------------------------------------------------------------------|
| Journal:                        | <i>BMJ Open</i>                                                                                                                                                                                                                                                                                                                                                                                                                                                                                                                                                                                               |
| Manuscript ID:                  | bmjopen-2013-002647                                                                                                                                                                                                                                                                                                                                                                                                                                                                                                                                                                                           |
| Article Type:                   | Protocol                                                                                                                                                                                                                                                                                                                                                                                                                                                                                                                                                                                                      |
| Date Submitted by the Author:   | 28-Jan-2013                                                                                                                                                                                                                                                                                                                                                                                                                                                                                                                                                                                                   |
| Complete List of Authors:       | Gray, Lindsay; Medical Research Council/Chief Scientist Office, Social and Public Health Sciences Unit<br>McCartney, Gerry; NHS Greater Glasgow and Clyde<br>White, Ian; Medical Research Council, Biostatistics Unit<br>Katikireddi, Srinivasa; Medical Research Council/Chief Scientist Office, Social and Public Health Sciences Unit<br>Rutherford, Lisa; ScotCen Social Research,<br>Gorman, Emma; Medical Research Council/Chief Scientist Office, Social and Public Health Sciences Unit<br>Leyland, Alastair; Medical Research Council/Chief Scientist Office, Social and Public Health Sciences Unit |
| <b>Primary Subject Heading</b>: | Public health                                                                                                                                                                                                                                                                                                                                                                                                                                                                                                                                                                                                 |
| Secondary Subject Heading:      | Addiction, Health policy, Mental health                                                                                                                                                                                                                                                                                                                                                                                                                                                                                                                                                                       |
| Keywords:                       | MENTAL HEALTH, Health informatics < BIOTECHNOLOGY & BIOINFORMATICS, Hepatology < INTERNAL MEDICINE, Substance misuse < PSYCHIATRY, PUBLIC HEALTH, STATISTICS & RESEARCH METHODS                                                                                                                                                                                                                                                                                                                                                                                                                               |
|                                 |                                                                                                                                                                                                                                                                                                                                                                                                                                                                                                                                                                                                               |

SCHOLARONE™  
Manuscripts

1  
2  
3 **Use of record-linkage to handle non-response and improve alcohol**  
4  
5 **consumption estimates in health survey data: A study protocol**  
6  
7  
8  
9  
10

11 Linsay Gray<sup>1§</sup>, Gerry McCartney<sup>2</sup>, Ian R White<sup>3</sup>, Srinivasa Vittal Katikireddi<sup>1</sup>, Lisa Rutherford<sup>4</sup>,  
12  
13 Emma Gorman<sup>1</sup>, Alastair H Leyland<sup>1</sup>  
14

15  
16  
17 1 MRC/CSO Social and Public Health Sciences Unit, Glasgow, UK

18 2 NHS Health Scotland, Glasgow, UK

19 3 MRC Biostatistics Unit, Cambridge, UK

20 4 ScotCen Social Research, Edinburgh, UK  
21  
22  
23  
24  
25

26 §Corresponding author  
27  
28  
29

30 Email addresses:  
31

32 LG: [l.gray@sphsu.mrc.ac.uk](mailto:l.gray@sphsu.mrc.ac.uk)

33 GM: [gmccartney@nhs.net](mailto:gmccartney@nhs.net)

34 IRW: [ian.white@mrc-bsu.cam.ac.uk](mailto:ian.white@mrc-bsu.cam.ac.uk)

35 SVK: [v.katikireddi@sphsu.mrc.ac.uk](mailto:v.katikireddi@sphsu.mrc.ac.uk)

36 LR: [lisa.rutherford@scotcen.org.uk](mailto:lisa.rutherford@scotcen.org.uk)

37 EG: [e.gorman@sphsu.mrc.ac.uk](mailto:e.gorman@sphsu.mrc.ac.uk)

38 AHL: [a.leyland@sphsu.mrc.ac.uk](mailto:a.leyland@sphsu.mrc.ac.uk)  
39  
40  
41  
42  
43  
44  
45  
46

47 **Short title:** Addressing Health Survey Non Response using record linkage  
48  
49  
50  
51  
52  
53  
54  
55  
56  
57  
58  
59  
60

**Abstract (300)****Introduction**

Reliable estimates of health-related behaviours, such as levels of alcohol consumption in the population are required to formulate and evaluate policies. National surveys provide such data; validity depends on generalisability but this is threatened by declining response levels. Attempts to address bias arising from non-response are typically limited to survey weights based on socio-demographic characteristics, which do not capture differential health and related behaviours within categories. This project aims to explore and address non-response bias in health surveys with a focus on alcohol consumption.

**Methods and analysis**

The Scottish Health Surveys (SHeS) aim to provide estimates representative of the Scottish population living in private households. Survey data of consenting participants (92% of the achieved sample) have been record-linked to routine hospital admission [Scottish Morbidity Records (SMR)] and mortality [from National Records of Scotland (NRS)] data for surveys conducted in 1995, 1998, 2003, 2008, 2009 and 2010 (total adult sample size around 40,000), with maximum follow-up of 16 years. Also available are census information and SMR/NRS data for the general population. Comparisons of alcohol-related mortality and hospital admission rates in the linked SHeS-SMR/NRS with those in the general population will be made. Survey data will be augmented by quantification of differences to refine alcohol consumption estimates through the application of multiple imputation or inverse probability weighting. The resulting corrected estimates of population alcohol consumption will enable superior policy evaluation. An advanced weighting procedure will be developed for wider use.

**Ethics and dissemination**

Ethics approval for SHeS has been given by NHS MREC and use of linked data has been approved by the Privacy Advisory Committee to the Board of NHS National Services Scotland and Registrar General. Funding has been granted by the MRC. The outputs will include four or five public health and statistical methodological international journal and conference papers.

1  
2  
3  
4  
5  
6  
7  
8  
9  
10  
11  
12  
13  
14  
15  
16  
17  
18  
19  
20  
21  
22  
23  
24  
25  
26  
27  
28  
29  
30  
31  
32  
33  
34  
35  
36  
37  
38  
39  
40  
41  
42  
43  
44  
45  
46  
47  
48  
49  
50  
51  
52  
53  
54  
55  
56  
57  
58  
59  
60

**Primary Subject Heading:** Public health

**Secondary Subject Heading: Addiction:** Health policy; Mental health.

**Keywords**

Mental health; Health informatics < BIOTECHNOLOGY & BIOINFORMATICS; Hepatology < INTERNAL MEDICINE; Substance misuse < PSYCHIATRY; PUBLIC HEALTH; STATISTICS & RESEARCH METHODS

For peer review only

Word count: 3816 (max 4000)

## Introduction

The large scale of social harms linked to alcohol is increasingly recognised, with alcohol abuse the most widely perceived social issue in Scotland.<sup>1</sup> Alcohol-related hospital admissions have quadrupled and death rates nearly tripled since the beginning of the 1980s<sup>1</sup> – relative increases which are the steepest in western Europe,<sup>2</sup> with detrimental repercussions for the wellbeing of the wider population. In response to the escalating problem, the Scottish Government (SG) has launched a strategic approach to reducing alcohol-related harm and helping to address associated health inequalities. The approach encompasses a comprehensive range of interventions, service development, and regulatory change – including the possibility of minimum unit pricing of alcohol – aimed largely at the whole population, alongside targeted interventions.<sup>3</sup> Given that alcohol harm is clearly linked to alcohol consumption at the individual<sup>4-5</sup> and population level,<sup>6</sup> the Strategy aims to reduce population mean consumption, proportions exceeding weekly and daily sensible drinking guidelines, and the prevalence of dependent drinkers and ultimately reduce alcohol-related harm. The SG has tasked National Health Service (NHS) Health Scotland (HS) to lead a portfolio of studies - “Monitoring and Evaluating Scotland’s Alcohol Strategy” (MESAS)<sup>1</sup>. As well as ultimate reductions alcohol-related harms, a key outcome for the MESAS evaluation is whether alcohol consumption is reduced<sup>3</sup>. However, reliable ascertainment of alcohol consumption – which is useful in intervention planning as well as in evaluation – is problematic.

Alcohol retail sales data provide the most valid and reliable means of estimating total population alcohol consumption<sup>7</sup>, but are limited to overall per capita consumption and do not give any information on the amount consumed by individual sub-groups (demographic, socioeconomic or geographic) or on patterns of drinking (e.g. binge drinking); they also exclude alcohol purchased abroad and home brewed, and cannot distinguish transactions made by visitors and residents. In contrast to sales data, health surveys, such as the Scottish

1  
2  
3 Health Survey (SHeS)<sup>8-14</sup>, provide estimates of population mean alcohol intake, drinking  
4 patterns, and differential intake across sub-groups.  
5  
6  
7  
8  
9

10  
11 However, a degree of error is unavoidable with such survey-based measures for two main  
12 reasons:<sup>15</sup> distorted self-reporting of intake (which tends to be under-reported for a variety of  
13 reasons including systematic underestimation and social desirability bias) and under-  
14 representation of groups associated with heavy drinking – men, younger individuals and those  
15 from deprived backgrounds, who have higher alcohol consumption than average, tend to be  
16 under-represented in surveys<sup>15</sup>. The SHeS suggests no association of alcohol intake with  
17 area deprivation<sup>16</sup> – for example, in 2008, 27% of men living in the most deprived quintile  
18 according to Scottish Index of Multiple Deprivation (SIMD) self-reported consumption which  
19 exceeded binge drinking thresholds compared with 25% of those in the least deprived  
20 quintile.<sup>1</sup> However, the rate of alcohol-related mortality<sup>17</sup> and hospital admissions<sup>18</sup> are much  
21 higher in those living in the most deprived areas than in the least deprived areas: in 2009  
22 alcohol-related mortality rates in the most deprived SIMD quintile (48 per 100,000 population)  
23 was 6 times that in the least deprived quintile (7 per 100,000 population); hospital admissions  
24 in 2009/10 were 7.5 times as high<sup>1</sup>. We would thus expect alcohol consumption estimates to  
25 be higher with greater deprivation and question the lack of such an association apparent from  
26 survey data.  
27  
28  
29  
30  
31  
32  
33  
34  
35  
36  
37  
38  
39  
40  
41  
42  
43

44 The discrepancy may be explained by one or more of the following: genuinely greater levels  
45 of alcohol-related harm among the more deprived for equivalent levels of consumption;<sup>5</sup>  
46 differential underestimation of self-reported consumption; a greater spread of drinking  
47 patterns within the most deprived areas *i.e.* a greater proportion of heavy drinkers *and* non-  
48 drinkers<sup>19</sup> – as indicated by SHeS data<sup>1</sup> – which averages the higher and lower consumption  
49 out in those communities when considering per capita consumption, potentially masking  
50 variation within deprivation strata; or differential sampling bias (either due to lower unit  
51 response levels in the most deprived areas or a similar response level across quintiles  
52  
53  
54  
55  
56  
57  
58  
59  
60

1  
2  
3 missing more extreme drinkers in the most deprived quintile relative to those in the least  
4 deprived quintile). It is also possible the association between alcohol consumption and harm  
5 differs between survey responders and non-responders, reflecting, for instance, differential  
6 patterns of consumption such as greater concentration of harmful binge drinking among non-  
7 responders for equivalent levels of overall consumption, or adverse combinations of different  
8 risk factors.<sup>20</sup>  
9

10  
11  
12  
13  
14  
15  
16  
17  
18 Comparison with UK sales data previously suggested that survey underestimation of alcohol  
19 intake may be as great as 50%,<sup>15</sup> and elevated sales estimates in recent years do not support  
20 SHeS-based time trends of reductions in alcohol consumption<sup>21</sup> (Table 1). The apparent  
21 discrepancy could be explained, at least in part, by progressively increasing survey  
22 underestimation of alcohol intake as response levels have fallen – as low as 61% in 2008 at  
23 the household level compared with 81% in 1995 (Table 1) – if the surveys have become  
24 increasingly less representative, especially for those living in deprived areas.<sup>22</sup> The  
25 inconsistency of drinking estimates from Scotland's surveys is thus of increasing concern as  
26 apparent population trends in consumption are potentially misleading. Addressing the issue is  
27 of wider importance for policy design and evaluation which rely on accurate and consistent  
28 monitoring of trends in population health.  
29  
30  
31  
32  
33  
34  
35  
36  
37  
38  
39  
40  
41

42 Correction for under-representation of specific population subgroups can be made by  
43 procedures such as inverse probability weighting (IPW)<sup>23</sup> assuming data are 'missing at  
44 random' (MAR – see Statistical methodology section/Appendix). However, the increasingly  
45 low response levels remain problematic if respondents and non-respondents with the same  
46 socio-demographic characteristics behave differently, for example in terms of health-related  
47 behaviours. The SHeS reports use IPW based on limited socio-demographic characteristics  
48 but, since non-participation is likely to be related to heavy drinking,<sup>15</sup> this invalidates IPW  
49 based solely on socio-demographic characteristics and the MAR assumption: simply  
50 increasing the weight given to the young, deprived male respondents does not address the  
51  
52  
53  
54  
55  
56  
57  
58  
59  
60

1  
2  
3 problem since those sampled are unlikely to be representative of the population of this  
4  
5 subgroup of heavy drinkers.  
6  
7

8  
9  
10 Previous work on impacts of unit non-response based on studies with varying response rates  
11 has generally found those of lower socioeconomic status in terms of employment,<sup>24</sup> income,<sup>25</sup>  
12 education<sup>26</sup> and area deprivation<sup>27</sup> are under-represented. Younger age groups,<sup>28</sup> men, single  
13 individuals and those with poorer health status<sup>29</sup> also tend to be under-represented, though  
14 this can vary.<sup>28 30</sup> Although estimates of association such as those between socioeconomic  
15 position and health outcomes are not generally distorted<sup>29 31</sup> (there are exceptions<sup>26</sup>),  
16 prevalence of behaviours related to poor health tend to be under-estimated. In an Australian  
17 study, participants experienced 10% greater survival relative to the general population<sup>32</sup> and a  
18 Finnish record-linkage study found that the risk of death was underestimated.<sup>31</sup> Where  
19 previous work on impacts of survey non-response has focussed on alcohol, in both a  
20 Canadian survey (47% response)<sup>25</sup> and a New Zealand survey (50% response)<sup>27</sup> among  
21 others<sup>33-34</sup> alcohol consumption was found to be under-estimated. A Danish survey-based  
22 cohort study found that the relatively healthy and affluent participants tended to have lower  
23 risks of alcohol overuse and tobacco-related disease outcomes relative to non-participants.<sup>29</sup>  
24 The “triangulation” of survey and sales data on alcohol to harmonise the survey-based  
25 consumption distribution with sales-derived per capita consumption has been demonstrated.<sup>35</sup>  
26  
27

28  
29  
30 Pilot work conducted by the group based on the 1995 SHeS with follow up<sup>36</sup> to 2001 aimed to  
31 investigate whether respondents were representative of the Scottish population in terms of all-  
32 cause mortality and coronary heart disease (CHD) incidence or mortality.<sup>37</sup> Standardised  
33 rates of incidence and mortality were calculated by sex for respondents aged 40–64 at the  
34 time of the survey and a comparison dataset was created based on population estimates and  
35 event registers for the entire Scottish population. Male participants in SHeS had lower than  
36 expected mortality from CHD and women higher incidence of CHD. Differences were seen for  
37 all levels of deprivation but were more pronounced in the most deprived areas and were  
38 geographically patterned. This work demonstrated that even with a relatively high response  
39 level, participants differ from the population they are intended to represent and reflect a  
40  
41  
42  
43  
44  
45  
46  
47  
48  
49  
50  
51  
52  
53  
54  
55  
56  
57  
58  
59  
60



1  
2  
3 potentially serious bias in health surveys.<sup>37</sup> Separately, in an attempt to resolve the effect of  
4 alcohol abstainers in deprived areas, some re-analysis of SHeS data involved removing those  
5 who had not drunk in the previous week.<sup>1</sup> While this yielded some of the expected deprivation  
6 gradient in alcohol consumption, it was not enough to explain the inequalities in alcohol-  
7 related harm, indicating the need for further exploration of the discrepancy between  
8 consumption estimates and harms among the most disadvantaged groups (fuller investigation  
9 of this is currently being pursued in a related project and potentially can be considered in an  
10 extension of this project).

11  
12  
13  
14  
15  
16  
17  
18  
19  
20 The aim of this project is to inform the monitoring and evaluation of the Scottish Government's  
21 Alcohol Strategy by exploiting existing record linked and population data resources and using  
22 advanced statistical methodology to quantify and address unit non-response induced  
23 imprecision of national health survey-based estimates of alcohol consumption (weekly intake;  
24 binge drinking; problem drinking) in the population of Scotland by age, sex, area deprivation  
25 and geographical region. Whilst some attempt shall be made to account for distortion of  
26 survey-based estimates due to self-report bias, the main focus of this project is on departure  
27 from representativeness, particularly that arising from unit non-response.

## 38 **Methods and analysis**

39  
40 SHeS are cross-sectional cluster-sampled surveys designed to provide data at both national  
41 and regional level about the health of the population living in private households in Scotland  
42 (Table 1)<sup>8-14</sup>. Scotland is one of very few countries to have created longitudinal information by  
43 way of record-linkage of survey data. Individual SHeS data are confidentially linked to  
44 prospective and retrospective routine hospital admission data [Scottish Morbidity Records  
45 (SMR)] and mortality [from the National Records of Scotland (NRS; formerly the General  
46 Register Office of Scotland)].<sup>36-39</sup> Despite declining overall survey response levels, the  
47 percentage consenting to linkage is high and has remained above 85%.<sup>36</sup> The database is  
48 maintained by Information Services Division (ISD) of NHS Scotland, and audits have shown  
49  
50  
51  
52  
53  
54  
55  
56  
57  
58  
59  
60

1  
2  
3 that SMR data are around 90% accurate in identifying the correct diagnosis,<sup>40</sup> and SMR  
4  
5 completeness is around 99%.<sup>41</sup>  
6  
7

8  
9 Also available are administrative mortality and hospital admission data for the general  
10  
11 population, as well as population estimates derived from routine data.  
12

13  
14 Robust protocols for identifying individuals with medical conditions attributable to alcohol have  
15  
16 been defined and published by NRS/Office of National Statistics and ISD and are used to  
17  
18 publish official statistics on alcohol mortality<sup>42-43</sup> and morbidity<sup>18</sup> respectively. Through  
19  
20 partnership with the market research agencies Nielsen Company and CGA Strategy,<sup>22</sup> we  
21  
22 have privileged access to alcohol sales data at the national level for Scotland.  
23

#### 24 25 ***Linked Scottish Health Survey-Scottish Morbidity Record/deaths***

26  
27 We plan to use the 1995, 1998, 2003, 2008, 2009 and 2010 SHeS records linked to SMR and  
28  
29 NRS records, providing a maximum follow-up of around 16 years with adult sample sizes  
30  
31 consenting to linkage of 7363, 8305 and 7425 for 1995, 1998 and 2003 respectively, and  
32  
33 around 5560, 6400 and 6230 for 2008, 2009 and 2010 respectively. From the SHeS-  
34  
35 SMR/NRS we have age, sex, area deprivation, health board region and estimates of weekly  
36  
37 intake (including an indicator of heavy drinking), binge drinking and problem drinking (all from  
38  
39 the survey-component; the latter two measures are available from 1998 onward) and  
40  
41 individually linked alcohol-related hospitalisation and mortality. We are missing all information  
42  
43 on the SHeS non-responders but we can infer their characteristics in terms of age, sex and  
44  
45 deprivation based on population estimates (see step 3 below).  
46

#### 47 48 ***General population data***

49  
50 From NRS we have mid-year population estimates based on the decennial census (96%  
51  
52 enumeration level), mortality, birth, immigration and emigration data. We have population  
53  
54 denominators in all survey years for the whole of Scotland and corresponding alcohol-related  
55  
56 hospitalizations (SMR) and deaths (NRS) in the general population data – all by age, sex,  
57  
58  
59  
60

1  
2  
3 area deprivation and region – from those years through to 2010 as numerators for  
4  
5 comparison with the survey data (see step 1 below).  
6  
7  
8  
9

### 10 ***Statistical methodology***

11  
12 We propose to compare survey data and population data to examine how representative the  
13  
14 respondents to the SHeSs are in terms of alcohol-related hospitalizations and deaths to  
15  
16 inform the improvement of survey-based estimates of alcohol consumption (Figure 1). This  
17  
18 involves comparing linked records for the survey samples with combined census records,  
19  
20 mortality and hospital admission data for the entire population by socio-demographic sub-  
21  
22 groups. These comparisons inform on departures from representativeness mainly arising from  
23  
24 bias induced by non-response. In the core set of analyses, we shall produce corrected alcohol  
25  
26 consumption estimates, assessing the differential effects of varying response levels. We shall  
27  
28 additionally develop an advanced correction procedure that can be tailored for different  
29  
30 population subgroups and survey response levels for application to other surveys with record-  
31  
32 linkage capacity. Finally, we shall inter-relate corrected survey-based consumption estimates  
33  
34 and national alcohol sales data to ascertain self-report bias and obtain further refined  
35  
36 estimates.  
37

38  
39 In missing data scenarios there are a number of possible missingness mechanisms. Data can  
40  
41 be missing completely at random (MCAR), missing at random (MAR) or missing not at  
42  
43 random (MNAR). If missingness depends on the observed data but not on the unseen data,  
44  
45 the missing observations are MAR. In this case, the individuals with complete data (the  
46  
47 'complete cases') are no longer representative and analysing complete cases gives biased  
48  
49 estimates. However, under MAR we can take the predictors of missingness into account in  
50  
51 analyses using techniques such as multiple imputation (MI)<sup>44</sup>. Imputation is the substitution of  
52  
53 some value for a missing data item. Among the imputation techniques available, MI is  
54  
55 considered to be superior as it makes reliable estimation of variances and confidence  
56  
57 intervals relatively easy. Once all missing values have been multiply imputed, the datasets  
58  
59  
60

1  
2  
3 can then be analysed using standard techniques for complete data and combined using  
4 standard rules.  
5  
6

7  
8 Alternatively, if the missingness depends on unobserved data (even after taking account all  
9 the information in observed data), the observations are MNAR. In this case, we have to  
10 incorporate sensitivity analyses – such as a pattern mixture approach – into MI. A pattern  
11 mixture model allows different imputation models for each pattern of missing values under  
12 specified MNAR mechanisms with the potential for very general application.<sup>45</sup> We aim to  
13 achieve this in Step 6 (below) by changing the imputations to allow them to represent likely  
14 differences in the associations between alcohol consumption and alcohol-related  
15 hospitalizations and deaths in those with observed compared with those with missing alcohol  
16 consumption data, by modifying the model intercept term before imputing.  
17  
18  
19  
20  
21  
22  
23  
24  
25

26  
27 The novel methodological approach we shall use is based on several assumptions: non-  
28 response in the (unlinked) SHeS dataset is MNAR; up to Step 5 (below) we are assuming that  
29 given alcohol-related hospitalizations and deaths for responders and non-responders, non-  
30 response in the SHeS-SMR dataset is MAR; step 6 goes one stage further, assuming alcohol-  
31 related harm is greater for non-responders than responders for a given level of consumption  
32 and attempts to account for this differential relationship.  
33  
34  
35  
36  
37  
38  
39

40 We propose to:

- 41 1. Compare rates of alcohol-related hospitalizations and deaths in the SHeS-SMR/NRS  
42 responders with corresponding rates in the general population for each socio-demographic  
43 category combination (age, sex, area deprivation and health board region).  
44
- 45 2. From 1, estimate the probability of alcohol-related hospitalizations and deaths in the non-  
46 responders to the SHeS by each socio-demographic combination (Figure 2).  
47
- 48 3. From the denominator data of the general population, identify the number of missing  
49 respondents within each socio-demographic combination group in the survey.  
50  
51  
52  
53  
54  
55  
56  
57  
58  
59  
60

- 1
- 2
- 3 4. From 1 and 2, simulate the observations for non-responders with the corresponding
- 4 alcohol-related hospitalization and death probabilities in each socio-demographic combination
- 5
- 6 group. To our knowledge, this has not been previously been done.
- 7
- 8 5. Multiply impute unknown alcohol consumption in the simulated 'non-responders' based on
- 9 socio-demographic characteristics and alcohol-related hospitalizations and deaths under the
- 10 assumption that the consumption data are MAR.
- 11
- 12 6. Change the alcohol consumption imputations to reflect the likely difference between
- 13 responders and non-responders in alcohol consumption for a given probability of alcohol-
- 14 related hospitalizations and deaths using a pattern mixture model approach which assumes
- 15 that the consumption data are 'missing not at random' (MNAR) given the observed data. The
- 16 effects of a range of differences will be explored, assuming, for instance, that the risk of
- 17 mortality is 10% or 20% higher in the non-responders than the responders for equivalent
- 18 levels of alcohol consumption.
- 19
- 20
- 21
- 22
- 23
- 24
- 25
- 26
- 27
- 28

29 We shall look separately at each round of the survey to see how the decline in non-response  
30 affects the estimates of alcohol consumption. An advanced correction procedure, likely to  
31 involve weighting, will be developed that can act differently for different subgroups (especially  
32 by deprivation) and survey response levels for application to other surveys with record-linkage  
33 capacity.  
34  
35  
36  
37  
38  
39  
40

#### 41 **Further work**

42 Consideration will be given to alternative approaches. These will include use of the SHeS-  
43 SMR/NRS to build an imputation model for alcohol consumption, which would then be  
44 extrapolated to impute consumption for the entire population; this would be done with caution  
45 since we would be imputing a high fraction of the data. We shall perform validity checks on  
46 any systematic difference between survey participants as a whole and those not consenting  
47 to linkage. For instance, we can make overall comparisons of reported alcohol consumption  
48 and drinking patterns as well as sociodemographic factors. Additionally, we can potentially  
49 use sensitivity analyses to address any differential consumption-outcome associations among  
50  
51  
52  
53  
54  
55  
56  
57  
58  
59  
60

1  
2  
3 deprivation categories, *i.e.* allowing for the possibility of genuinely greater levels of alcohol-  
4 related harm among the more deprived for equivalent levels of consumption.<sup>5</sup> Sensitivity  
5 parameters would be identified from literature reviews as well as detailed discussion with co-  
6 applicants with experience in the alcohol field and other experts who could give critical  
7 feedback on proposed sensitivity parameters. Integration of corrected survey estimates of  
8 alcohol consumption with sales data will allow further refining of estimates.<sup>35</sup> There is a risk  
9 that the socio-demographic variables alone will not provide sufficient data for the response  
10 model for alcohol consumption. If modelling problems occurred indicating this as a limitation,  
11 we would seek the addition of marital status, which is associated with alcohol-related harm<sup>20</sup>  
12 and is available from hospital admissions, death certificates and population census records.  
13 Should our proposed approach of simulating age, sex and area data for non-responders fail, a  
14 method for IPW with MNAR would be considered.<sup>46</sup> Analyses may be complicated by the  
15 apparent dichotomy in the drinking behaviour of the most deprived groups who are the most  
16 likely not to drink at all, or to drink little within the moderate drinking category but also the  
17 most likely to drink at harmful levels.<sup>19</sup> We shall address this by considering a separate  
18 variable representing very heavy alcohol consumption, for which missing data would be  
19 directly imputed in addition to the other alcohol estimates. We shall also consider the  
20 incorporation of estimates of alcohol consumption among those admitted to hospital based on  
21 previously developed methodology.<sup>47</sup>

### 40 **Implications**

41 An optimal means of ensuring survey representativeness is attainment of high levels of  
42 response (based on an accurate and up-to-date sampling frame). While this has been  
43 achievable in the past, great efforts are required in survey conduct to maintain response  
44 levels of around two-thirds in the SHeS at the present time. Our proposed approach forms an  
45 important additional strategy to addressing non-response which is applied at the analysis  
46 stage.<sup>48</sup> The key innovations of this approach are the simulation of observations for non-  
47 responders, and the explicit incorporation of differential associations for non-responders and  
48 responders for any given age / sex / deprivation / region combination by factoring in an  
49 alternative hospital admission/mortality rate for the non-responders by implementation of a  
50  
51  
52  
53  
54  
55  
56  
57  
58  
59  
60

1  
2  
3 pattern mixture-based approach. The latter attempts to find plausible sensitivity analyses of  
4 departures from data being MAR and fits with the paradigm of 'principled sensitivity  
5 analysis',<sup>49</sup> much discussed in the statistical literature but little implemented in practice.  
6  
7  
8  
9

10 Evaluation of public health policy such as strategies to tackle alcohol problems in Scotland  
11 (and beyond) will benefit from enhanced knowledge with the improved estimates of alcohol  
12 consumption and prevalence of harmful drinking and dependency we aim to offer. The  
13 detection of changes in behaviour and harms in specific groups such as deprived groups and  
14 hazardous drinkers necessary to evaluate effectiveness of, for instance, minimum unit pricing  
15 of alcohol relative to general duty rises will be supported. The accuracy of the assertion that  
16 there is a small proportion of the population who drink very heavily and who are responsible  
17 for the vast majority of harms may also be elucidated.  
18  
19  
20  
21  
22  
23  
24

25  
26  
27 There is potential general application of this work beyond alcohol to other survey-derived  
28 information – tobacco, diet and physical activity, for instance. Data from population surveys  
29 are used extensively and methodological improvements are of interest to a wide international  
30 audience. The advanced correction procedure we aim to create will potentially be applicable  
31 to existing and future surveys for improved addressing of non-response bias wherever there  
32 is the capacity to record-link surveys with administrative health data. Presently, linkage of  
33 survey data to routine health records represents a cost-effective means of generating  
34 valuable longitudinal data but is performed in very few countries. In exploiting such linkage to  
35 improve conventional survey-based estimates, our work will demonstrate the extended utility  
36 of record linkage, providing further impetus for its wider uptake internationally. Simulation of  
37 demographic variables for survey non-responders is not necessary in countries with unique  
38 population identifiers and comprehensive linkage (such as the Nordic countries) with the  
39 ability to follow-up all individuals regardless of response status. The multiple imputation of  
40 survey data for non-responders and the pattern mixture aspects of our proposed methodology  
41 would nevertheless be applicable in these settings. The prospect of increasing the validity of  
42 survey data is increasingly valuable in the context of decreasing survey response, as well as  
43 increasing fiscal austerity.  
44  
45  
46  
47  
48  
49  
50  
51  
52  
53  
54  
55  
56  
57  
58  
59  
60

## Ethics and dissemination

### Ethics and dissemination

Ethics approval of the SHeS have been given by the NHS Multi-Centre Research Ethics Committee (MREC03/0/19 for 2003; 07/MRE09/55 for 2008; 08/MRE09/62 for 2009-2011; reference numbers prior to 2003 are unavailable) and the supply and use of linked data has been approved by the Privacy Advisory Committee to the Board of NHS National Services Scotland and Registrar General (PAC 47/12; IR2012-01837). Funding for this work has been granted by the Medical Research Council Methodology Research Panel under the Population and Patient Data Sharing Initiative for Research into Mental Health (MR/J013498/1).

The outputs of the research will include a series of papers which are likely to include:

Public health papers:

1. A baseline assessment of the differential alcohol-related admissions/mortality in the survey samples relative to the general population;
2. Reporting of refined alcohol estimates;
3. Combination with sales data to ascertain self-report bias among responders, and further refine estimates.

Statistical methodological papers:

1. The novel application of pattern mixture modelling for refining survey estimates using record-linked data.
2. Establishing a correction methodology based on the non-response level which can be applied to future surveys.

### Data sharing statement

The SHeS<sup>8-14</sup> and combined SHeS-SMR<sup>36 38-39</sup> have been created through substantial investment and are used extensively as the bases of secondary analysis by the research community; release of these anonymised resources is determined by ISD. The value added by this work is the corrective procedure methodology which will be published and hence



1  
2  
3 available to researchers to replicate the enhanced data created by this project, as well as  
4  
5 produce similarly enhanced data from others record-linked surveys. Given this, neither is it  
6  
7 possible for us to share, nor is there is no benefit to the research community of having access  
8  
9 to the specific file created.

## 10 11 12 **ARTICLE SUMMARY**

### 13 14 **Article focus**

15  
16 ▪ To explore and address non-response bias in the health surveys, with a specific focus on  
17  
18 alcohol consumption.

### 19 20 21 **Key messages**

22  
23 ▪ National health surveys provide estimates of behaviours in the population – such as levels  
24  
25 of alcohol consumption – which inform health policies, but validity depends on their  
26  
27 representativeness of the general population. Declining response levels mean that surveys  
28  
29 may be becoming less representative.

30  
31 ▪ This project aims to compare data from Scottish Health Surveys record-linked to  
32  
33 administrative health data sources with corresponding general population data to resolve non-  
34  
35 representativeness by using differentials to derive probabilities of alcohol-related  
36  
37 hospitalizations and deaths in non-responders; the numbers missing from surveys will be  
38  
39 identified by demographic sub-group to simulate observations for non-responders with  
40  
41 corresponding alcohol-related harm probabilities and then multiply impute alcohol  
42  
43 consumption.  
44  
45  
46  
47  
48  
49  
50  
51  
52  
53  
54  
55  
56  
57  
58  
59  
60

1  
2  
3 ▪ More accurate alcohol consumption estimation will lead to improved evaluation of  
4 interventions and enhanced information for policy. We shall ultimately devise a general  
5 application correction factor which will offer a valuable boost to survey-based research.  
6  
7  
8  
9

### 10 11 12 **Strengths and limitations of this study**

13  
14 ▪ The strengths of this work are the reliable utilisation of existing linked survey records and  
15 the extension of comparisons of responders and non-responders from basic socio-  
16 demographic variables to health outcomes.  
17  
18 ▪ The limitations include the possibility of distortion from non-consent to record linkage of  
19 survey responders which could explain some of the disparities between alcohol-related harm  
20 outcomes in the survey samples relative to the general population; however, this only affects  
21 7%-15% of respondents and is unlikely to greatly distort findings. With incomplete (around  
22 96%) enumeration level, there is also uncertainty about the representativeness of the Census;  
23 although there is a concern that resultant under-estimation of the population denominator  
24 estimates (but not of the alcohol-related hospitalisation and mortality) may lead to artificially  
25 elevated alcohol-related harm estimates (particularly for the most disadvantaged groups), this  
26 will be minimised by the limited extent of the population non-enumeration (around 4%).  
27  
28 The scale of mismatch between survey and population estimates may vary over time because  
29 of differences in self-reporting (e.g. greater home drinking or more binge drinking) making it  
30 increasingly difficult for respondents to estimate their consumption as well as differential non-  
31 response levels. Thus although we may derive a correction method for a particular year, it is  
32 potentially invalid to apply it in future years. However, the differential non-response factor is  
33 likely to be predominant. Socioeconomic characteristics may change between the time of  
34 survey and the hospitalisation or death event according to the social selection thesis,<sup>50</sup> but  
35 this is likely to account for only a very small number of individuals.  
36  
37  
38  
39  
40  
41  
42  
43  
44  
45  
46  
47  
48  
49  
50  
51

### 52 53 54 **Competing interests statement**

55  
56 GM is a member of the Scottish Government-funded MESAS evaluation. The remaining  
57 authors declare that they have no competing interests.  
58  
59  
60

**Authors' contributions**

LG was involved in the conception of the study design, literature search, and prepared the first draft of the manuscript; GM and IRW contributed to all sections of the paper; SVK contributed to all sections and the literature search; EG and LR contributed to the introduction and further work sections; AHL was involved in the conception of the study design, literature search and contributed to all sections. All authors read and approved the final manuscript.

**Funding statement**

This work is supported by the Medical Research Council Methodology Research Panel under the Population and Patient Data Sharing Initiative for Research into Mental Health grant number [MR/J013498/1].

**Acknowledgements**

Thank you to Lesley Graham from Information Services Division Scotland and Clare Beeston from NHS Health Scotland who are advisers on the project.

## References

1. Beeston C, Robinson M, Craig N, et al. Monitoring and Evaluating Scotland's Alcohol Strategy. Setting the Scene: Theory of change and baseline picture. Edinburgh: NHS Health Scotland, 2011.
2. Leon DA, McCambridge J. Liver cirrhosis mortality rates in Britain from 1950 to 2002: an analysis of routine data. *Lancet* 2006;367(9504):52-6.
3. Scottish Government. Changing Scotland's relationship with alcohol. A framework for action, 2009.
4. Graham L. Alcohol Statistics Scotland 2011. Edinburgh: Information Services Division Scotland, 2011.
5. McDonald SA, Hutchinson SJ, Bird SM, et al. Association of self-reported alcohol use and hospitalization for an alcohol-related cause in Scotland: a record-linkage study of 23,183 individuals. *Addiction* 2009;104(4):593-602.
6. Norstrom T. Per capita alcohol consumption and all-cause mortality in 14 European countries. *Addiction* 2001;96 Suppl 1:S113-28.
7. Robinson M, Thorpe R, Beeston C, et al. A Review of the Validity and Reliability of Alcohol Retail Sales Data for Monitoring Population Levels of Alcohol Consumption: A Scottish Perspective. *Alcohol Alcohol* 2012.
8. Dong W, Erens B, (Eds). Scotland's Health: Scottish Health Survey 1995 (2 Volumes). Edinburgh: The Stationery Office, 1997.
9. Shaw A, McMunn A, Field J, (Eds). The Scottish Health Survey 1998 (2 Volumes). Edinburgh: The Stationery Office, 2000.
10. Bromley C, Sprogston K, Shelton N, (Eds). The Scottish Health Survey 2003 (4 Volumes). Edinburgh: The Stationery Office, 2005.
11. Bromley C, Bradshaw P, Given L. *The Scottish Health Survey 2008 (2 Volumes)*. Edinburgh: The Scottish Government Health Directorate, 2009.
12. Bromley C, Given L, Ormston R. *The Scottish Health Survey 2009 (2 Volumes)*. Edinburgh: The Scottish Government Health Directorate, 2010.
13. Bromley C, Given L. *The Scottish Health Survey 2010 (2 Volumes)*. Edinburgh: The Scottish Government Health Directorate, 2011.
14. Bromley C, Sharp C, Given L. *The Scottish Health Survey 2011 (3 Volumes)*. Edinburgh: The Scottish Government Health Directorate, 2012.
15. Catto S. How much are people in Scotland really drinking? A review of data from Scotland's routine national surveys. Glasgow: Public Health Observatory Division, NHS Health Scotland, 2008.
16. Reid S. Volume 1: Main Report, Chapter 3: Alcohol consumption. In: Bromley C, Bradshaw P, Given L, editors. *The Scottish Health Survey 2008*. Edinburgh: The Scottish Government Health Directorate, 2009.
17. Leyland A, Dundas R, McLoone P, et al. Inequalities in mortality in Scotland 1981-2001. *Occasional Paper 16*. Glasgow: MRC Social and Public Health Sciences Unit, 2007.

18. Information Services Division. Alcohol-related Hospital Statistics 2010. Edinburgh 2010.
19. Health Analytical Services Division Scottish Government. Alcohol consumption and harm across income groups, May 2010.
20. Lawder R, Grant I, Storey C, et al. Epidemiology of hospitalization due to alcohol-related harm: Evidence from a Scottish cohort study. *Public Health* 2011;125(8):533-9.
21. Robinson M, Beeston C, Mackison D. Monitoring and Evaluating Scotland's Alcohol Strategy: An update of alcohol sales and price band analyses. Edinburgh: NHS Health Scotland, 2012.
22. Robinson M, Craig N, Beeston C, et al. Monitoring and Evaluating Scotland's Alcohol Strategy: An update of alcohol sales and price band analyses. Edinburgh: NHS Health Scotland, 2011.
23. Seaman SR, White IR. Review of inverse probability weighting for dealing with missing data. *Stat Methods Med Res* 2011.
24. Goldberg M, Chastang JF, Leclerc A, et al. Socioeconomic, demographic, occupational, and health factors associated with participation in a long-term epidemiologic survey: a prospective study of the French GAZEL cohort and its target population. *Am J Epidemiol* 2001;154(4):373-84.
25. Zhao J, Stockwell T, Macdonald S. Non-response bias in alcohol and drug population surveys. *Drug Alcohol Rev* 2009;28(6):648-57.
26. Lorant V, Demarest S, Miermans PJ, et al. Survey error in measuring socio-economic risk factors of health status: a comparison of a survey and a census. *Int J Epidemiol* 2007;36(6):1292-9.
27. Meiklejohn J, Connor J, Kypri K. The effect of low survey response rates on estimates of alcohol consumption in a general population survey. *PLoS One* 2012;7(4):e35527.
28. Schneider KL, Clark MA, Rakowski W, et al. Evaluating the impact of non-response bias in the Behavioral Risk Factor Surveillance System (BRFSS). *J Epidemiol Community Health* 2012;66(4):290-5.
29. Osler M, Kriebbaum M, Christensen U, et al. Rapid report on methodology: does loss to follow-up in a cohort study bias associations between early life factors and lifestyle-related health outcomes? *Ann Epidemiol* 2008;18(5):422-4.
30. Vinther-Larsen M, Riegels M, Rod MH, et al. The Danish Youth Cohort: characteristics of participants and non-participants and determinants of attrition. *Scand J Public Health* 2010;38(6):648-56.
31. Harald K, Salomaa V, Jousilahti P, et al. Non-participation and mortality in different socioeconomic groups: the FINRISK population surveys in 1972-92. *J Epidemiol Community Health* 2007;61(5):449-54.
32. Hockey R, Tooth L, Dobson A. Relative survival: a useful tool to assess generalisability in longitudinal studies of health in older persons. *Emerg Themes Epidemiol* 2011;8(1):3.
33. Lahaut VM, Jansen HA, van de Mheen D, et al. Estimating non-response bias in a survey on alcohol consumption: comparison of response waves. *Alcohol Alcohol* 2003;38(2):128-34.
34. Makela P, Paljarvi T. Do consequences of a given pattern of drinking vary by socioeconomic status? A mortality and hospitalisation follow-up for alcohol-related

- 1  
2  
3 causes of the Finnish Drinking Habits Surveys. *J Epidemiol Community Health*  
4 2008;62(8):728-33.
- 5  
6 35. Rehm J, Kehoe T, Gmel G, et al. Statistical modeling of volume of alcohol exposure for  
7 epidemiological studies of population health: the US example. *Popul Health Metr*  
8 2010;8:3.
- 9  
10 36. Gray L, Batty GD, Craig P, et al. Cohort profile: the Scottish Health Surveys cohort:  
11 linkage of study participants to routinely collected records for mortality, hospital  
12 discharge, cancer and offspring birth characteristics in three nationwide studies. *Int J*  
13 *Epidemiol* 2010;39(2):345-50.
- 14  
15 37. Leyland AH, Finlayson A, Clark D, et al. Assessing the representativeness of health  
16 surveys. *European Journal Of Public Health* 2004;14(4 Supplement):45.
- 17  
18 38. Hanlon P, Lawder R, Elders A, et al. An analysis of the link between behavioural,  
19 biological and social risk factors and subsequent hospital admission in Scotland. *J*  
20 *Public Health (Oxf)* 2007;29(4):405-12.
- 21  
22 39. Lawder R, Elders A, Clark D. Using the Linked Scottish Health Survey to Predict  
23 Hospitalisation & Death. An analysis of the link between behavioural, biological and  
24 social risk factors and subsequent hospital admission and death in Scotland.  
25 Technical Report: NHS Health Scotland & Information Services NHS NSS, 2007.
- 26  
27 40. Harley K, Jones C. Quality of Scottish Morbidity Record (SMR) data. *Health Bull (Edinb)*  
28 1996;54:410-17.
- 29  
30 41. Managing Data Quality: SMR Completeness.
- 31  
32 42. Grant I, Springbett A, Graham L. Alcohol attributable mortality and morbidity: alcohol  
33 population attributable fractions for Scotland. Edinburgh: Information Services  
34 Division National Services Scotland, June 2009.
- 35  
36 43. The Scottish Government Alcohol Information Scotland. ICD Codes.
- 37  
38 44. Sterne JA, White IR, Carlin JB, et al. Multiple imputation for missing data in  
39 epidemiological and clinical research: potential and pitfalls. *Brit Med J*  
40 2009;338:b2393.
- 41  
42 45. Little R. Pattern-mixture models for multivariate incomplete data. *Journal of the American*  
43 *Statistical Association* 1993;88:125-34.
- 44  
45 46. Dufouil C, Brayne C, Clayton D. Analysis of longitudinal studies with death and drop-out: a  
46 case study. *Stat Med* 2004;23(14):2215-26.
- 47  
48 47. NHS Quality Improvement Scotland. Understanding Alcohol Misuse in Scotland:  
49 HARMFUL DRINKING Final Report, 2008.
- 50  
51 48. Maclennan B, Kypri K, Langley J, et al. Non-response bias in a community survey of  
52 drinking, alcohol-related experiences and public opinion on alcohol policy. *Drug*  
53 *Alcohol Depend* 2012;126(1-2):189-94.
- 54  
55 49. Kenward M, Goetghebeur E, Molenberghs G. Sensitivity analysis for incomplete  
56 categorical tables. *Statistical Modelling* 2001;1(31-48).
- 57  
58 50. Hart CL, Davey Smith G, Upton MN, et al. Alcohol consumption behaviours and social  
59 mobility in men and women of the Midspan Family study. *Alcohol Alcohol*  
60 2009;44(3):332-6.

- 1  
2  
3 51. General Register Office for Scotland. Alcohol-related deaths, by sex and age-group,  
4 Scotland, 1979 to 2011. [http://www.gro-scotland.gov.uk/files2/stats/alcohol-related-](http://www.gro-scotland.gov.uk/files2/stats/alcohol-related-deaths/ard-2011-table1.pdf)  
5 [deaths/ard-2011-table1.pdf](http://www.gro-scotland.gov.uk/files2/stats/alcohol-related-deaths/ard-2011-table1.pdf). *Alcohol-related Deaths*. Edinburgh: General Register  
6 Office for Scotland, 2012.  
7  
8  
9  
10  
11  
12  
13  
14  
15  
16  
17  
18  
19  
20  
21  
22  
23  
24  
25  
26  
27  
28  
29  
30  
31  
32  
33  
34  
35  
36  
37  
38  
39  
40  
41  
42  
43  
44  
45  
46  
47  
48  
49  
50  
51  
52  
53  
54  
55  
56  
57  
58  
59  
60

1  
2  
3  
4  
5  
6  
7  
8  
9  
10  
11  
12  
13  
14  
15  
16  
17  
18  
19  
20  
21  
22  
23  
24  
25  
26  
27  
28  
29  
30  
31  
32  
33  
34  
35  
36  
37  
38  
39  
40  
41  
42  
43  
44  
45  
46  
47  
48  
49

**Table 1: Response levels and alcohol consumption estimates in men in the Scottish Health Surveys, retail-based consumption estimates and population male alcohol-related mortality in Scotland 1995 to 2011**

| Survey Year | Survey data              |                      |                       |                    |                                    | National retail data                                   | National mortality data                            |
|-------------|--------------------------|----------------------|-----------------------|--------------------|------------------------------------|--------------------------------------------------------|----------------------------------------------------|
|             | Household response level | Adult response level | Achieved adult sample | Consent to linkage | Mean alcohol units per week in men | Total volume of pure alcohol sold (1000L) <sup>c</sup> | Number of male alcohol-related deaths <sup>e</sup> |
| 1995        | 81%                      | 84%                  | 7,932                 | 93%                | 20.1 <sup>a</sup>                  | 41,712                                                 | 531                                                |
| 1998        | 77%                      | 76%                  | 9,047                 | 92%                | 19.8 <sup>a</sup>                  | 43,770 <sup>d</sup>                                    | 755                                                |
| 2003        | 67%                      | 54%                  | 8,148                 | 91%                | 19.8 <sup>b</sup>                  | 47,175                                                 | 1,056                                              |
| 2008        | 61%                      | 54%                  | 6,465                 | 86%                | 18.0 <sup>b</sup>                  | 50,346                                                 | 971                                                |
| 2009        | 64%                      | 56%                  | 7,531                 | 85%                | 17.5 <sup>b</sup>                  | 50,842                                                 | 837                                                |
| 2010        | 63%                      | 55%                  | 7,245                 | 86%                | 16.0 <sup>b</sup>                  | 50,524                                                 | 909                                                |
| 2011        | 66%                      | 56%                  | 7,544                 | 86%                | 15.0 <sup>b</sup>                  | 48,746                                                 | 815                                                |

<sup>a</sup> the 1995 and 1998 surveys were prior to the significant change in the way in which alcohol consumption estimates were derived and are for men aged 16 to 64 only thus are not comparable with those for 2003 onward;

<sup>b</sup> the estimates for surveys from 2003 onward are for men aged 16 and over;

<sup>c</sup> Source: Nielsen/CGA Strategy sales in Scotland dataset (off-trade sales in 2011 adjusted to account for the loss of discount retailers);<sup>21</sup>

<sup>d</sup> Data not available for 1998 - estimate interpolated from available figures for 1995 and 2000;

<sup>e</sup> Source: General Register Office for Scotland figures for 2011.<sup>51</sup>



Figure 1. Summary of proposed methodological strategy for addressing survey non-representativeness and refining alcohol consumption estimates

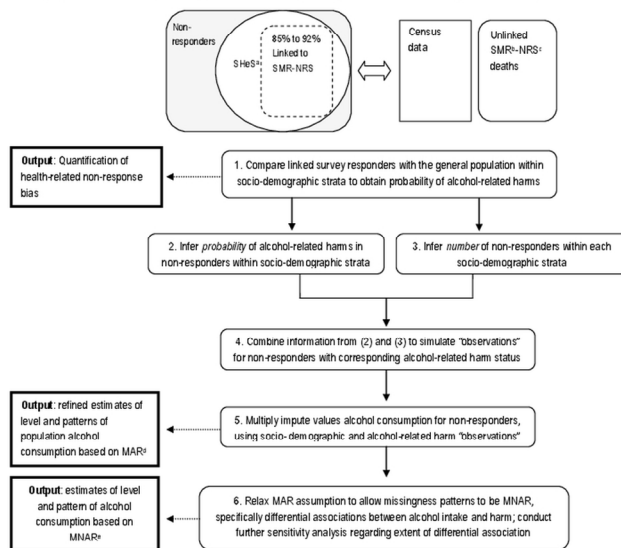

\*SHeS: Scottish Health Survey; \*SMR: Scottish Morbidity Record; \*NRS: National Records of Scotland; \*MAR: missing at random; \*MNAR: missing not at random.

Summary of proposed methodological strategy for addressing survey non-representativeness and refining alcohol consumption estimates  
127x90mm (300 x 300 DPI)

Review only

1  
2  
3  
4  
5  
6  
7  
8  
9  
10  
11  
12  
13  
14  
15  
16  
17  
18  
19  
20  
21  
22  
23  
24  
25  
26  
27  
28  
29  
30  
31  
32  
33  
34  
35  
36  
37  
38  
39  
40  
41  
42  
43  
44  
45  
46  
47  
48  
49  
50  
51  
52  
53  
54  
55  
56  
57  
58  
59  
60

**Figure 2:** Estimating the probability of alcohol-related hospitalisation/mortality in Scottish Health Survey non-respondents from alcohol-related hospitalisation/mortality data on respondents and on the general population of Scotland

$$P(\text{a-r h}^{\text{a}} \text{ in the non-respondents})^{\text{b}} = \frac{[P(\text{a-r h}^{\text{a}} \text{ in the general population})^{\text{b}} - \text{survey response proportion} * P(\text{a-r h}^{\text{a}} \text{ in the respondents})^{\text{b}}]}{(1 - \text{survey response proportion})}$$

<sup>a</sup> a-r h: alcohol-related harm - hospitalisation or mortality from alcohol-related causes

<sup>b</sup> P(x): Probability of x

127x90mm (300 x 300 DPI)

view only
